# Supplementary material for: c-di-AMP hydrolysis by the phosphodiesterase AtaC promotes differentiation of multicellular bacteria
Source: PubMed Central journal article supplement — Proc Natl Acad Sci U S A. 2020 Mar 18;117(13):7392–400. doi: 10.1073/pnas.1917080117 (PMC7132281; doi:10.1073/pnas.1917080117), 2020-03-18
Supplement: pnas.1917080117.sapp.pdf [file pnas.1917080117.sapp.pdf]

1 SUPPLEMENTARY INFORMATION FOR:

2  
3 **c-di-AMP hydrolysis by the phosphodiesterase AtaC**  
4 **promotes differentiation of multicellular bacteria**  
5

6 **Andreas Latoscha, David Jan Drexler, Mahmoud M. Al-Bassam, Adrian M. Bandera,**  
7 **Volkhard Kaever, Kim C. Findlay, Gregor Witte\* and Natalia Tschowri\***

8 \* Corresponding author: natalia.tschowri@hu-berlin.de

9 \* Correspondence may also be addressed to: witte@genzentrum.lmu.de

10  
11 **This PDF file includes:**

- 12 • Extended Experimental Procedures
- 13 • Table S1
- 14 • Figures S1 to S7
- 15 • Supplementary References

16  
17 **EXTENDED EXPERIMENTAL PROCEDURES**

18 **Bacterial strains and growth conditions**

19 All strains used in this study are listed in Table S1. *Escherichia coli* strains were grown in LB  
20 medium under aerobic conditions at 37 °C. If required, LB was supplemented with 100 µg/ml  
21 ampicillin (Amp), 50 µg/ml kanamycin (Kan), 50 µg/ml apramycin (Apr) and/or 15 µg/ml  
22 chloramphenicol (Cam). If hygromycin B (Hyg) was used, LB agar was replaced by Nutrient  
23 Agar (NA; Roth) and LB was substituted by LBon (LB without salt) with addition of 16 µg/ml  
24 and 22 µg/ml Hyg, respectively. *S. venezuelae* strains (Table S1) were grown aerobically at 30  
25 °C in liquid Maltose-Yeast Extract-Malt Extract (MYM) medium (1) supplemented with trace  
26 element solution (2) or on MYM agar. For growth analysis, 50 ml MYM were inoculated with  
27 spores at a final concentration of 10<sup>6</sup> CFU/ml and OD was measured at 578 nm. To study  
28 development, 12 µl of 10<sup>5</sup> CFU/µl *S. venezuelae* spores were spread as patches on MYM agar  
29 and bacteria were photographed using a Canon EOS 1300D (W) camera after 4 days of growth  
30 at 30 °C. For osmopressure experiments, 10 µl of serially diluted of *S. venezuelae* spores (10<sup>1</sup> to

31  $10^4$  CFU/ $\mu$ l) were dropped on NA medium with or without 0.5 M NaCl, respectively. Plates  
32 were incubated at 30 °C and pictures were taken using a Canon EOS 1300D (W) camera. For  
33 *in vivo* interaction studies using Bacterial Adenylate Cyclase Two-Hybrid (BACTH) assays  
34 three corresponding single transformants of *E. coli* W3110  $\Delta$ *cya* were suspended in 1 ml of  
35 sterile phosphate buffered saline (PBS) and 3  $\mu$ l of the resulting suspension was spotted on a  
36 plate containing MacConkey Base Agar (Difco) supplemented with Amp (100  $\mu$ g/ml), Kan (50  
37  $\mu$ g/ml) and maltose (1%). The plate was photographed using a Canon EOS 1300D (W) camera  
38 after growth at 26 °C for 24 h.

### 39 **Generation and complementation of *S. venezuelae* c-di-AMP mutants**

40 Oligonucleotides and bacterial strains used for mutagenesis are listed Table S1.

41 *Generation of vnz\_27310 (ataC) deletion mutant and phage transduction.* The *ataC*  
42 deletion was conducted using a modified Redirect PCR targeting protocol (3, 4). *E. coli*  
43 BW25113/pIJ790 cells induced for  $\lambda$  Red mediated recombination and containing cosmid  
44 PI1\_F15 (with *ataC*) were transformed with PCR amplified *aac(3)IV-oriT (apr-oriT)* cassette  
45 extended with regions homologous to the *ataC* locus. After growth of transformants in presence  
46 of apramycin only, cosmids were isolated and re-transformed into *E. coli* W3110 with selection  
47 for Apr resistance. Correct integration of the Apr resistance cassette was verified by PCR using  
48 test primers annealing to the *ataC* flanking region (Table S1). PI1\_F15 *ataC::apr* was  
49 transformed into strain ET12567/pUZ8002 and conjugated into wild type *S. venezuelae*.  
50 Bacteria were plated on SFM agar, incubated overnight at room temperature (RT), overlaid  
51 with 20  $\mu$ l of 25 mg/ml nalidixic acid (Nal) and of 50 mg/ml Apr in 2 ml ddH<sub>2</sub>O and incubated  
52 at 30 °C. *S. venezuelae* colonies were selected on NA containing Apr and Nal to remove *E. coli*.  
53 Kan<sup>S</sup> and Apr<sup>R</sup> mutants were confirmed by PCR.

54 The *ataC::apr* allele was transduced into a new wild type background via SV1 phage  
55 using a modified protocol from (5). Briefly, SV1 wild type phages were diluted and mixed with  
56 *S. venezuelae*  $\Delta$ *ataC* spores. After overnight incubation at 30 °C, plates were soaked with LB  
57 at RT and phages were gathered and filtered using a 0.45  $\mu$ m filter. 100  $\mu$ l phages containing  
58 the *ataC::apr* allele were plated with wild type spores on MYM agar and incubated overnight  
59 at RT. For selection of desired transductants, plates were overlaid with 20  $\mu$ l 50 mg/ml Apr in  
60 2 ml ddH<sub>2</sub>O. The *ataC* deletion was confirmed by PCR.

61 *Generation of disA deletion mutant.* The *disA* mutant was generated by transduction of  
62 the *disA::apr* allele (6) into the *S. venezuelae* wild type using SV1 phage.

63           *Generation of disA<sub>D86A</sub> point mutation.* The point mutation was introduced using a  
64 combination of modified Redirect PCR targeting and single stranded DNA recombineering  
65 protocols as described in (7). The Kan resistance cassette in cosmid SV-4-B12 (containing *disA*)  
66 was exchanged with *apr-oriT* extended with homologous regions to *neo*. The resulting cosmid  
67 was used to generate the *E. coli* strain HME68/SV-4-B12 *neo::apr-oriT* which was induced for  
68  $\lambda$  Red recombination and electroporated with the mutagenic oligonucleotide  
69 *disA\_D86Achr\_rev* and oligo100 (8) and plated on MacConkey agar containing 1% galactose  
70 and Apr. Red, Apr<sup>R</sup> clones were analyzed for the *disA::disA<sub>D86A</sub>* allele by PCR using a primer  
71 pair specific for the D86A mutation and sequencing. Purified cosmid was electroporated into  
72 ET12567/pUZ8002 and conjugated into wild type *S. venezuelae*. Single colonies were selected  
73 on NA medium containing Apr and Nal followed by growth on NA without antibiotics to  
74 achieve loss of the cosmid. Colonies sensitive to Apr were verified for the *disA* D86A mutation  
75 by sequencing.

76           *Complementation of the deletion mutants.* To complement the *disA* deletion, a DNA  
77 fragment containing the wild type allele with 528 bp upstream of the start codon (including  
78 *disA* promoter) was cloned into pIJ10770 or its derivative p3xFLAG which allow integration  
79 at the *attB<sub>ΦBT1</sub>* site in the *S. venezuelae* chromosome. pIJ10770-*disA* and p3xFLAG-*disA*,  
80 respectively, were conjugated into *disA::apr* using *E. coli* ET12567/pUZ8002. After selection  
81 on NA medium containing Nal and Hyg, Hyg<sup>R</sup> colonies were grown on MYM agar for spore  
82 stock generation.

83           The complementation of the *ataC* deletion mutant with the wild type allele was  
84 conducted similarly. Here, using an overlap PCR, a DNA fragment corresponding to 200 bp  
85 upstream of the start codon of *vnz\_27305* was fused to full length *ataC* resulting in the construct  
86 *vnz\_27305prom-ataC*. The fragment was cloned into pIJ10770 resulting in the plasmid  
87 pSVAl11 and introduced into the  $\Delta$ *ataC* chromosome as described above. For  
88 complementation of  $\Delta$ *ataC* with the D269N allele, pSVAl11 was used as template in a  
89 backbone PCR to amplify a circular construct with the primers D269N\_backbone\_f and  
90 D269N\_backbone\_r. The plasmid pIJ10770-*vnz\_27305prom-ataC<sub>D269N</sub>* was generated, the  
91 mutation confirmed by sequencing and conjugated into  $\Delta$ *ataC* as described above.

## 92 **Construction of plasmids**

93 Oligonucleotides used for cloning are listed in Table S1. *disA*, *vnz\_31010*, *ataC* and *vnz\_28055*  
94 were amplified from *S. venezuelae* genomic DNA (gDNA). D86A point mutation in *disA* was

95 introduced by following the four-primer/two-step PCR protocol (9). PCR products of all  
96 constructs were cloned into the pET15b vector. The *ataC*<sub>D269N</sub> construct was obtained using  
97 quick change site directed mutagenesis using the pET15b-*ataC* plasmid as a template. Codon  
98 optimized *ataC*<sub>Spm</sub> was synthesized *de novo* and cloned into pET15b via the NdeI and BamHI  
99 restriction sites by GenScript.

100 Full-length *cpeA* (*vnz\_28055*) and *cpeB* (*vnz\_28050*) excluding the respective stop codons were  
101 cloned into pUT18 and pKNT25 (Euromedex). The resulting constructs carry in-frame fusions  
102 of the sequences encoding the T18 and T25 fragments of *cyaA* from *Bordetella pertussis* to the  
103 3' end of *cpeA* and *cpeB*, respectively. Expression of the fused genes is under control of the *lac*  
104 promoter(*lacP*). To introduce *disA-FLAG* into pUT18-*vnz\_28055*, the gene was PCR-amplified  
105 from the plasmid p3xFLAG-*disA* with introduction of homologous regions to *lacP* and pUT18-  
106 *vnz\_28055*. Additionally, *lacP* was amplified from pUT18 with homologous regions to pUT18-  
107 *vnz\_28055* and *disA-FLAG*. pUT18-*vnz\_28055*, *lacP* and *disA-FLAG* were combined via  
108 Gibson Assembly (New England BioLabs) to generate the plasmid pUT18-*vnz\_28055-disA-*  
109 *FLAG*. The resulting plasmid encodes the *cpeA-T18* fusion as well as *lacP*-controlled *disA-*  
110 *FLAG* downstream of the T18 fragment. A quick change site directed mutagenesis using  
111 pUT18-*vnz\_28055-disA-FLAG* and primers *disA\_D86A\_fwd* and *disA\_D86A\_rev* was  
112 performed to generate pUT18-*vnz\_28055-disA<sub>D86A</sub>-FLAG*.

### 113 **Protein overexpression and purification**

114 pET15b constructs were transformed into *E. coli* BL21 (DE3) pLysS. Rosetta (DE3) pET28-  
115 *disA<sub>Bsu</sub>* was directly used for overexpression. LB containing Amp and Cam (and 0.2% glucose  
116 in case of PDEs) was inoculated 1:100 with overnight cultures and grown with shaking at 37  
117 °C. For DisA<sub>Bsu</sub> overexpression, Amp was replaced with 25 µg/ml Kan. Cultures were induced  
118 with a final concentration of 0.1-0.2 mM IPTG at OD<sub>578</sub> between 0.5 and 0.7; cultures for PDE  
119 overexpression were supplemented with 0.35 mM MnCl<sub>2</sub> (10). Proteins were overexpressed  
120 overnight at 16 °C and shaking. Subsequently, cultures were pelleted and lysed using a  
121 FrenchPress. Strains expressing DisA variants and 6xHis-CpeA were lysed in DisA lysis buffer  
122 (20 mM Tris HCl, pH 8; 300 mM NaCl, 10% glycerol, 20 mM imidazole; 0.05% Triton X-100;  
123 0.5 mM DTT; 5 mM MgCl<sub>2</sub>) supplemented with cComplete protease inhibitor cocktail tablets,  
124 EDTA-free (Roche). Strains expressing 6xHis-Vnz\_31010, 6xHis-AtaC and 6xHis-AtaC<sub>Spm</sub>  
125 were lysed in PDE lysis buffer containing cComplete protease inhibitor cocktail tablets, EDTA-  
126 free (similar to DisA lysis buffer but Tris HCl, pH 8 replaced by 20 mM Tris HCl 7.5; MgCl<sub>2</sub>

127 replaced by 10 mM MnCl<sub>2</sub>). Clarified lysate supernatants of 6xHis-tagged proteins were loaded  
128 on 0.5-1 ml 50% Ni-NTA SuperFlow (iba) overnight at 4 °C. Then, the matrix was washed with  
129 respective lysis buffers. DisA protein variants and 6xHis-CpeA were eluted with the following  
130 buffer: 50 mM Tris HCl, pH 8; 300 mM NaCl; 10% glycerol; 250 mM imidazole; 0.5 mM  
131 DTT; 5 mM MgCl<sub>2</sub>. The PDE elution buffer was similar to DisA elution buffer but containing  
132 50 mM Tris HCl, 7.5 instead of Tris HCl, pH 8 and 10 mM MnCl<sub>2</sub> instead of MgCl<sub>2</sub>. Fractions  
133 containing eluted proteins (identified by Coomassie staining of 12% polyacrylamide gels) were  
134 pooled. Eluates of DisA variants and 6xHis-CpeA were dialyzed twice in DisA cyclase buffer  
135 (25 mM Tris HCl, pH 8; 250 mM NaCl, 10 mM MgCl<sub>2</sub>, 5 mM β-mercaptoethanol, 10% glycerol  
136 (modified from (11), and tested PDEs were dialyzed twice in PDE buffer with 5-10% glycerol  
137 (20 mM Tris HCl, pH 7.5; 50 mM NaCl; 10 mM MnCl<sub>2</sub> (modified from (10) at 4 °C under  
138 stirring. Dialyzed proteins were stored at -20 °C until further use in diadenylate cyclase (DAC),  
139 differential radial capillary action of ligand (DRaCALA) or phosphodiesterase (PDE) assays.  
140 For characterization of biophysical properties of 6xHis-AtaC and 6xHis-AtaC<sub>D269N</sub>, Rosetta  
141 (DE3) cell pellets containing pET15b-*ataC* and pET15b-*ataC*<sub>D269N</sub> constructs, respectively,  
142 were resuspended in buffer A (20 mM HEPES, 300 mM NaCl, 20 mM imidazole, 10% glycerol,  
143 0.5 mM MnCl<sub>2</sub>, pH 7.5) and lysed by sonication. After centrifugation, clear supernatant was  
144 loaded on Ni-NTA columns. The columns were washed with buffer A and proteins were eluted  
145 with buffer B (20 mM HEPES, 100 mM NaCl, 250 mM imidazole, 10% glycerol, 0.5 mM  
146 MnCl<sub>2</sub>, pH 7.5). Protein elution fractions were concentrated prior to size exclusion  
147 chromatography on a HiLoad Superdex 200 column (GE Healthcare) equilibrated with buffer  
148 C (20 mM HEPES, 100 mM NaCl, 0.5 mM MnCl<sub>2</sub>, pH 7.5). Pure proteins were concentrated,  
149 flash frozen in liquid nitrogen and stored at -80 °C.

#### 150 **c-di-AMP extraction and quantification**

151 The nucleotide extraction protocol from (12) was adapted to *Streptomyces*. Wild type,  $\Delta$ *disA*  
152 and  $\Delta$ *ataC* strains were grown in 100 ml MYM. Beginning with 10 h, 5 ml samples for c-di-  
153 AMP extraction and two 1 ml samples for protein determination were taken every 2 h. c-di-  
154 AMP samples were centrifuged at 4000 rpm and 4 °C for 15 min using a swing rotor (Heraeus  
155 Megafuge 16R, Thermo Scientific), frozen in liquid nitrogen and stored at -80 °C. Protein  
156 samples were centrifuged at max. speed and stored at -20 °C.

157 For c-di-AMP extraction, samples were suspended in 800 μl Extraction mixture II  
158 (acetonitrile/methanol/water [2:2:1]), transferred into 2 ml screw cap tubes prefilled with 0.1

159 mm silica beads (Biozym), shock frozen for 15 s in liquid nitrogen and heated for 10 min at 95  
160 °C. After cooling on ice, samples were disrupted using the BeadBlaster at 4 °C with 2 cycles at  
161 6 m/s for 45 s and 2 min interval. Samples were cooled for 15 min on ice and centrifuged at  
162 max. speed and 4 °C for 15 min. Supernatants were transferred into a 2 ml reaction tubes.  
163 Remaining pellets were suspended in 600 µl Extraction mixture I (acetonitrile/methanol [1:1]),  
164 pulsed two times for 30 s at 6 m/s with a 60 s interval, incubated on ice and centrifuged as  
165 above. The extraction with 600 µl Extraction mixture I was repeated once. All supernatants (~2  
166 ml) were combined and stored for protein precipitation for two days at -20 °C. Precipitated  
167 proteins were removed by centrifugation and the precipitation step was repeated. Finally,  
168 samples were air dried in a SpeedVac Plus SC110A connected to Refrigerated Vapor Trap  
169 RVT100 (Thermo Scientific) at low temperature settings and analyzed using LC-MS/MS as  
170 described in (12).

171 Samples for protein quantification were suspended in 800 µl 0.1 M NaOH, transferred into 2  
172 ml screw cap tubes prefilled with 0.1 mm silica beads (Biozym) and heated for 10 min at 98  
173 °C. Cell lysis was performed in BeatBlaster with 2 pulses for 30 s at 6 m/s and an interval of 2  
174 min. Lysates were centrifuged at max. speed and 4 °C for 15 min. Supernatant was saved and  
175 the extraction step was repeated. Supernatants were combined and protein concentration was  
176 determined via Bradford using Roti-Quant.

177 For normalization of c-di-AMP concentration to the protein amount, following formula was  
178 used:

$$179 \frac{c-di-AMP [nM] \cdot 200 \mu l}{cV [ml] \cdot c590 \left[ \frac{\mu g}{ml \text{ cells}} \right]} = \frac{c-di-AMP [pmol]}{protein [mg]}$$

### 180 **Isothermal Titration Calorimetry**

181 ITC experiments were performed using a Malvern PEAQ-ITC system with 21 µM protein in  
182 ITC buffer (20 mM HEPES, pH = 7.5; 100 mM NaCl) in the cell. The respective nucleotides  
183 (210 µM) were titrated into the cell by 19 injections of 2 µl, spaced 150 s apart, at 25 °C. The  
184 data was analyzed using the MicroCal PEAQ-ITC analysis software provided with the  
185 instrument. All titrations were repeated to confirm robustness of the assay.

### 186 **Size-exclusion chromatography (SEC) coupled static light scattering and analytical SEC**

187 Determination of the molecular weight of AtaC was performed using a 24 ml Superdex S200  
188 increase size-exclusion column (GE Healthcare Lifesciences) connected to a multi-angle laser  
189 light scattering and a refractive index monitor (WYATT miniDAWN TREOS, WYATT

190 Outilab T-rEX). Data were analyzed using the ASTRA software package provided with the  
191 instrument (Wyatt). Static light scattering data of CpeA samples were obtained using the same  
192 column connected to a ÄKTAmicro system (GE Healthcare Lifesciences) equipped with  
193 Malvern/Viscotek RI and RALS (right-angle laser scattering) devices (as described in (13)).  
194 Data evaluation was done using the OmniSEC software package. Analytical SEC runs were  
195 performed on an ÄKTAmicro system and a 24 ml Superdex S75 column.

#### 196 **Surface plasmon resonance**

197 SPR experiments were conducted using a Biacore X100+ (GE Healthcare Lifesciences) at 25  
198 °C. 2'-Biotin-16-c-di-AMP (BioLog) was immobilized on a SA-chip (GE Healthcare  
199 Lifesciences) in HPS-EP+ buffer (10 mM Hepes pH 7.4, 150 mM NaCl, 3 mM EDTA, 0.05%  
200 v/v Surfactant P20) to a final RU of 150. The analyte (CpeA) was injected at concentrations of  
201 1-100 µM (dimer concentration) in HPS-EP+ with a contact time of 120 s. Between every  
202 injection the chip was regenerated by 30 s injections of 6 M Urea and 2 M NaCl. The resulting  
203 sensorgrams were analysed by the Biacore evaluation software. Steady state report point for  
204 data evaluation was chosen 5 seconds prior to injection stop.

#### 205 **Heat resistance assay**

206 Spore heat resistance was assessed as previously described (5).  $\sim 10^9$  CFU/ml spores were  
207 shocked at 50 °C for 1 h. Spores were serially diluted for colony forming unit (CFU)  
208 determination. The ratio of CFU after heat shock versus CFU before the heat shock was used  
209 to calculate the survival rate for each strain.

#### 210 **Bioinformatic characterization of AtaC and its abundance in prokaryotes**

211 A local PATRIC database was installed and used to determine the conservation of AtaC  
212 (PGF\_00172869) across prokaryotes (Dataset S1). Duplicated entries with identical genome  
213 were removed (177 in total), but keeping the first entry. An in-house python script was used to  
214 extract taxonomic information for each of the AtaC homologues. Specifically, the accession  
215 number of each species was used to access NCBI taxonomy and the taxonomic information was  
216 integrated with the original PATRIC table. Only phyla with more than 5 genomes were kept,  
217 and entries with no taxonomic information were excluded from the analysis.

218

219 **Table S1. Strains, plasmids and oligonucleotides used in this study**

|                           | Genotype or comments                                                                                                                                                                                                                                                       | Source or reference                      |
|---------------------------|----------------------------------------------------------------------------------------------------------------------------------------------------------------------------------------------------------------------------------------------------------------------------|------------------------------------------|
| <b>Strains</b>            |                                                                                                                                                                                                                                                                            |                                          |
| <i>S. venezuelae</i>      |                                                                                                                                                                                                                                                                            |                                          |
| NRRL B-65442              | Wild type                                                                                                                                                                                                                                                                  | (NCBI Reference Sequence: NZ_CP018074.1) |
| <i>disA::apr</i>          | ATCC 10712 <i>SVEN_3211::aac(3)IV</i> ; Apr <sup>R</sup>                                                                                                                                                                                                                   | (6)                                      |
| SVAL5                     | $\Delta$ <i>disA::apr</i> , <i>attB</i> <sub>ΦBT1</sub> ::p3xFLAG- <i>disA</i> ; Apr <sup>R</sup> , Hyg <sup>R</sup>                                                                                                                                                       | This study                               |
| SVAL8                     | <i>disA::disA</i> <sub>D86A</sub>                                                                                                                                                                                                                                          | This study                               |
| SVAL19                    | $\Delta$ <i>disA</i> (SV1-transduction); Apr <sup>R</sup>                                                                                                                                                                                                                  | This study                               |
| SVAL20                    | $\Delta$ <i>vnz_27310::apr</i> (Redirect); Apr <sup>R</sup>                                                                                                                                                                                                                | This study                               |
| SVAL22                    | $\Delta$ <i>ataC::apr</i> (SV1-transduction from SVAL20); Apr <sup>R</sup>                                                                                                                                                                                                 | This study                               |
| SVAL24                    | $\Delta$ <i>disA::apr</i> , <i>attB</i> <sub>ΦBT1</sub> ::pIJ10770- <i>disA</i> ; Apr <sup>R</sup> , Hyg <sup>R</sup>                                                                                                                                                      | This study                               |
| SVAL26                    | $\Delta$ <i>ataC::apr</i> , <i>attB</i> <sub>ΦBT1</sub> ::pIJ10770- <i>vnz_27305prom-ataC</i> ; Apr <sup>R</sup> , Hyg <sup>R</sup>                                                                                                                                        | This study                               |
| SVAL27                    | $\Delta$ <i>ataC::apr</i> , <i>attB</i> <sub>ΦBT1</sub> ::pIJ10770- <i>vnz_27305prom-ataC</i> <sub>D269N</sub> ; Apr <sup>R</sup> , Hyg <sup>R</sup>                                                                                                                       | This study                               |
| <i>E. coli</i>            |                                                                                                                                                                                                                                                                            |                                          |
| W3110                     | K-12 derivative; <i>F</i> <sup>-</sup> , $\lambda$ <sup>-</sup> , <i>rpoS</i> ( <i>Am</i> ), <i>rph-1</i> , <i>Inv</i> ( <i>rrnD-rrnE</i> )                                                                                                                                | (14)                                     |
| W3110 $\Delta$ <i>cyd</i> | W3110 derivative with deleted adenylate cyclase                                                                                                                                                                                                                            | (15)                                     |
| ET12567/pUZ8002           | <i>dam</i> , <i>dcm</i> , <i>hsd</i> ; Kan <sup>R</sup> , Cm <sup>R</sup>                                                                                                                                                                                                  | (16)                                     |
| BW25113/pIJ790            | ( $\Delta$ ( <i>araD-araB</i> )567, $\Delta$ <i>lacZ</i> 4787(:: <i>rrnB-4</i> ), <i>lacI</i> p-4000( <i>lacI</i> <sup>Q</sup> ), $\lambda$ <sup>-</sup> , <i>rpoS</i> 369( <i>Am</i> ), <i>rph-1</i> , $\Delta$ ( <i>rhaD-rhaB</i> )568, <i>hsdR</i> 514; Cm <sup>R</sup> | (17)                                     |



|                                                    |                                                                                                                               |               |
|----------------------------------------------------|-------------------------------------------------------------------------------------------------------------------------------|---------------|
| BL21 (DE3) pLysS                                   | F <sup>-</sup> <i>ompT hsdS</i> (rB <sup>-</sup> mB <sup>-</sup> ) <i>gal dcm</i> λ(DE3), Cm <sup>R</sup>                     | Promega       |
| HME68                                              | W3110 Δ( <i>argF-lac</i> )U169 <i>galKtyr145UAG</i><br><i>mutS</i> <> <i>cat</i>                                              | (18)          |
| Rosetta (DE3)<br>pET28- <i>disA</i> <sub>Bsu</sub> | Overexpression of <i>Bacillus subtilis</i> DisA; Kan <sup>R</sup> , Cm <sup>R</sup>                                           | (19)          |
| Rosetta 2 (DE3)                                    | F <sup>-</sup> <i>ompT hsdS</i> <sub>B(rB<sup>-</sup> mB<sup>-</sup>)</sub> <i>gal dcm</i> (DE3) pRARE2<br>(Cm <sup>R</sup> ) | Novagen       |
| <b>Plasmids</b>                                    |                                                                                                                               |               |
| pIJ773                                             | Plasmid template for amplification of the <i>apr-oriT</i><br>cassette for 'Redirect' PCR-targeting; Apr <sup>R</sup>          | (3)           |
| pIJ790                                             | Modified λRED recombination plasmid [ <i>oriR101</i> ]<br>[ <i>repA101</i> (ts)] <i>araBp-gam-be-exo</i> ; Cm <sup>R</sup>    | (3)           |
| pIJ10770                                           | pMS82 derivative; Hyg <sup>R</sup>                                                                                            | (20)          |
| pUZ8002                                            | RP4 derivative with defective <i>oriT</i> ; Kan <sup>R</sup>                                                                  | (16)          |
| p3xFLAG                                            | pIJ10770 derivative containing <i>3xFLAG</i> sequence<br>downstream of MCS; Hyg <sup>R</sup>                                  | (21)          |
| pGEX_6P_1                                          | T7 expression vector (modified MCS); Amp <sup>R</sup>                                                                         | GE Healthcare |
| pET15b                                             | T7 expression vector; Amp <sup>R</sup>                                                                                        | Novagen       |
| pKNT25                                             | Low copy vector encoding the T25 fragment of<br><i>Bordetella pertussis cyaA</i> downstream of the MCS;<br>Kan <sup>R</sup>   | Euromedex     |
| pUT18                                              | High copy vector encoding the T18 fragment of <i>B.</i><br><i>pertussis cyaA</i> downstream of the MCS; Amp <sup>R</sup>      | Euromedex     |
| pECAL1                                             | pET15b- <i>disA</i> ; Amp <sup>R</sup>                                                                                        | This study    |
| pECAL4                                             | pET15b- <i>disA</i> <sub>D86A</sub> ; Amp <sup>R</sup>                                                                        | This study    |
| pECAL12                                            | pET15b- <i>ataC</i> ; Amp <sup>R</sup>                                                                                        | This study    |
| pECAL13                                            | pET15b- <i>vnz_31010</i> ; Amp <sup>R</sup>                                                                                   | This study    |

|          |                                                                                                                               |            |
|----------|-------------------------------------------------------------------------------------------------------------------------------|------------|
| pECAL16  | pET15b- <i>ataC<sub>Spn</sub></i> ; Amp <sup>R</sup>                                                                          | This study |
| pECAL17  | pET15b- <i>vnz_28055 (cpeA)</i> ; Amp <sup>R</sup>                                                                            | This study |
| pECAL18  | pKNT25- <i>vnz_28050 (cpeB)</i> ; Kan <sup>R</sup>                                                                            | This study |
| pECAL19  | pUT18- <i>vnz_28055 (cpeA)</i> ; Amp <sup>R</sup>                                                                             | This study |
| pECAL20  | pUT18- <i>vnz_28055-disA-FLAG</i> ; Amp <sup>R</sup>                                                                          | This study |
| pECAL21  | pUT18- <i>vnz_28055-disA<sub>D86A</sub>-FLAG</i> ; Amp <sup>R</sup>                                                           | This study |
| pSVAL6   | pIJ10770- <i>disA</i> ; Hyg <sup>R</sup>                                                                                      | This study |
| pSVAL11  | pIJ10770- <i>vnz_27305prom-ataC</i> (200 bp upstream of <i>vnz_27305</i> start codon fused to <i>ataC</i> ); Hyg <sup>R</sup> | This study |
| pSVAL12  | pIJ10770- <i>vnz_27305prom-ataC<sub>D269N</sub></i> (pSVAL11 derivative); Hyg <sup>R</sup>                                    | This study |
| pSVNT-10 | p3xFLAG- <i>disA</i> ; Hyg <sup>R</sup>                                                                                       | This study |
| pDD29    | pET15b- <i>ataC<sub>D269N</sub></i> (pECAL12 derivative); Amp <sup>R</sup>                                                    | This study |

220 Underlined nucleotides indicate restriction sites, nucleotides in bold represent introduced mutations and  
221 nucleotides in italics indicate sequences overlapping to other genes

| Oligonucleotide                                                                                                                 | Sequence                                                                   |
|---------------------------------------------------------------------------------------------------------------------------------|----------------------------------------------------------------------------|
| <b>Oligonucleotides used for generation of the chromosomal <i>disA</i> D86A point mutation, PCR verification and sequencing</b> |                                                                            |
| disA_D86Achr_rev                                                                                                                | TCTTGGTGATGTCCTTGTGCGAGGACGAGCGCGCCCGCGAGCTTGAC<br>AGCTCCCGCAGCCGCGTGGCGGC |
| disA_D86A_check_fwd                                                                                                             | GGAGCTGTGCAAGCTCGCG                                                        |
| disA_fwd_NdeI                                                                                                                   | TATCATATGGTGGCAGCCAAGGAC                                                   |
| disA_rev_XhoI                                                                                                                   | TATCTCGAGCTAGACGTACCGCTCAAG                                                |
| <b>Oligonucleotides used for verification of <i>disA</i> deletion</b>                                                           |                                                                            |
| disA_test_f                                                                                                                     | GTGGTTCACTCACGCCGCATGAACGGTTC                                              |

|                                                                                                                                  |                                                                        |
|----------------------------------------------------------------------------------------------------------------------------------|------------------------------------------------------------------------|
| disA_test_r                                                                                                                      | GGCACGTACCTGGTGGAGGCCGAAGGTG                                           |
| <b>Oligonucleotides used for complementation of <i>disA</i> deletion with <i>disA-3xFLAG</i></b>                                 |                                                                        |
| 3142_NdeI-for                                                                                                                    | GCTGCATATGGGCCGGCGGGTCCG                                               |
| 3142_XhoI-rev                                                                                                                    | GCAGCCTCGAGGACGTACCGCTCAAGGATC                                         |
| <b>Oligonucleotides used for complementation of <i>disA</i> deletion with wild type <i>disA</i></b>                              |                                                                        |
| 3142_NdeI-for                                                                                                                    | GCTGCATATGGGCCGGCGGGTCCG                                               |
| disA_rev_XhoI                                                                                                                    | TATCTCGAGCTAGACGTACCGCTCAAG                                            |
| <b>Oligonucleotides used for <i>vnz_27310 (ataC)</i> deletion and PCR verification</b>                                           |                                                                        |
| 27310_fwd_Apra                                                                                                                   | CGAAGCGATCGCGGCCACCGCCGCGCCCACCCGCTGATGATTCCGGG<br><i>GATCCGTCGACC</i> |
| 27310_rev_Apra                                                                                                                   | GGTCGTGGGGGGGAGGAGACGGGTGAGGAGTGGGCTCATGTAGGC<br><i>TGGAGCTGCTTC</i>   |
| 27310_test_f                                                                                                                     | ACACCGTGCGGCAGACCC                                                     |
| 27310_test_r                                                                                                                     | TTCCCGCAGTCCATGGTTCC                                                   |
| <b>Oligonucleotides used for complementation of <i>ataC</i> deletion (sequences overlapping to putative promoter in italics)</b> |                                                                        |
| 27305prom_f_NdeI                                                                                                                 | TATCATATGGGTGTCCCGGCTCGTCGAC                                           |
| 27305prom_r_OL_ataC                                                                                                              | GCTGCACCATGGACTCCATCCTACGGGGCT                                         |
| ataC_f_OL_27305prom                                                                                                              | <i>GATGGAGTCCATGGTGCAGCCGACCGCCGT</i>                                  |
| 5409_rev_XhoI                                                                                                                    | TATACTCGAGTCAGGTGCGGACTTCGAG                                           |
| <b>Oligonucleotides used for generation of <i>pIJ10770-vnz_27305prom-ataC<sub>D269N</sub></i></b>                                |                                                                        |
| D269N_backbone_f                                                                                                                 | CGGCGCTGTACGTCACGGCCAACCACGGCATGGTCGACAT                               |
| D269N_backbone_r                                                                                                                 | ATGTCGACCATGCCGTGGTTGGCCGTGACGTACAGCGCCG                               |
| <b>Oligonucleotides used for generation of pET15b overexpression constructs</b>                                                  |                                                                        |

|                                                                                                            |                                                 |
|------------------------------------------------------------------------------------------------------------|-------------------------------------------------|
| disA_fwd_NdeI                                                                                              | TATCATATGGTGGCAGCCAAGGAC                        |
| disA_rev_XhoI                                                                                              | TATCTCGAGCTAGACGTACCGCTCAAG                     |
| disA_D86A_fwd                                                                                              | GCAAGCTCGCGGGCGCGCTC                            |
| disA_D86A_rev                                                                                              | GAGCGCGCCCCGCGAGCTTGC                           |
| 5409_fwd_NdeI                                                                                              | TATCATATGATGGTGCAGCCGACCG                       |
| 5409_rev_XhoI                                                                                              | TATACTCGAGTCAGGTGCGGACTTCGAG                    |
| 6143_fwd_NdeI (for<br><i>vnz_31010</i> )                                                                   | TATCATATGGTGATCGTCATCGCCCATGT                   |
| 6143_rev_BamHI (for<br><i>vnz_31010</i> )                                                                  | TATGGATCCTCAGACCGGCACGGTC                       |
| 28055_fwd_NdeI                                                                                             | TAT CATATG GTGCCTGCTCCACGGATG                   |
| 28055_rev_XhoI                                                                                             | TATA CTCGAG TCACTCCCGTCCGAGTATGG                |
| <b>Oligonucleotides used for generation of the pET15b-<i>ataC</i><sub>D269N</sub> construct</b>            |                                                 |
| DD60AtaC(D269N)_fwd                                                                                        | GTACGTCACGGCCAACCACGGCATGGTCGA                  |
| DD61AtaC(D269N)_rev                                                                                        | GGCCGTGACGTACAGCGCCGAGC                         |
| <b>Oligonucleotides used for generation of the constructs for bacterial two hybrid interaction studies</b> |                                                 |
| 28050_NT25f_XbaI                                                                                           | TATCTAGACGTGCATTCCGCTCTGTTTCCT                  |
| 28050_NT25r_KpnI                                                                                           | TATGGTACCCGCGCGCGGCCGGCCGGATCCT                 |
| 28055_T18f_KpnI                                                                                            | TATGGTACCGCCTGCTCCACGGATGAGC                    |
| 28055_T18r_EcoRI                                                                                           | TAGCAGAATTCTGACTCCCGTCCGAGTATGGAGG              |
| T18RCKC_disAFLAG_f                                                                                         | <i>cgacaagtag</i> TATGGTGCCTCTCAGTAC            |
| T18RCKC_lacp_r                                                                                             | <i>gtgccagctg</i> TTACTTAGTTATATCGATTGGC        |
| lacp_T18RCKC_f                                                                                             | <i>aactaagtaa</i> CAGCTGGCAGACAGGTTTC           |
| lacp_disAFLAG_r                                                                                            | <i>ccttgctgc</i> CATAGCTGTTTCCTGTGTGAAATTGTTATC |

|                    |                                                |
|--------------------|------------------------------------------------|
| disAFLAG_lacp_f    | <i>aacagctatg</i> GCAGCCAAGGACGGGGCA           |
| disAFLAG_T18RCKC_r | <i>gtgcaccata</i> CTACTTGTCGTCATCGTCCTTGTAGTCG |
| T18RCKC_testFLAG_f | <i>gagcggacgttcgaagtct</i>                     |
| T18RCKC_testFLAG_r | <i>cggtcacagcttgctgtaa</i>                     |

222

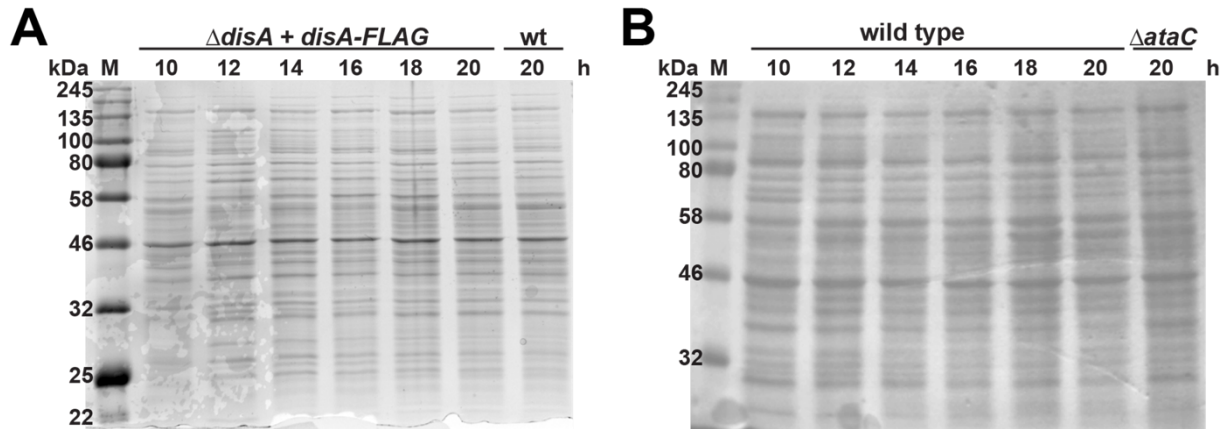

223  
 224 **Figure S1. Loading controls for Western blot analysis of DisA-FLAG and AtaC**  
 225 **expression patterns.**

226 (A) C-terminally FLAG-tagged *disA* was introduced using the integrative pIJ10770 vector into  
 227  $\Delta disA$  strain and expressed under the control of its native promoter from the *attB* <sub>$\Phi$ BT1</sub> integration  
 228 site.

229 (B) Wild type *S. venezuelae* was used for AtaC analysis.

230 Strains were grown in liquid MYM at 30 °C and samples were taken every 2 hours after  
 231 indicated time of growth (numbers above the lanes). *S. venezuelae* wild type and  $\Delta ataC$   
 232 samples harvested after 20 hours of growth served as negative controls in the relevant assays.  
 233 Whole cell lysates were prepared as described in (21). 5 and 10  $\mu$ g of whole cell proteins were  
 234 used for DisA-FLAG and AtaC detection, respectively. For each Western blot analysis, the  
 235 proteins were separated on two SDS polyacrylamide gels that were run in parallel in SDS buffer  
 236 at 50 mA for 40-50 min. One gel was stained with Coomassie and used as loading control  
 237 (Figure S1A, B). The other gel was used for Western blotting and detection of DisA-FLAG  
 238 with anti-FLAG as primary antibody (Sigma) (Figure 1C) or AtaC with anti-AtaC antiserum as  
 239 primary antibody (generated by Pineda GmbH using purified 6xHis-AtaC) (Figure 4B).

240

241

242

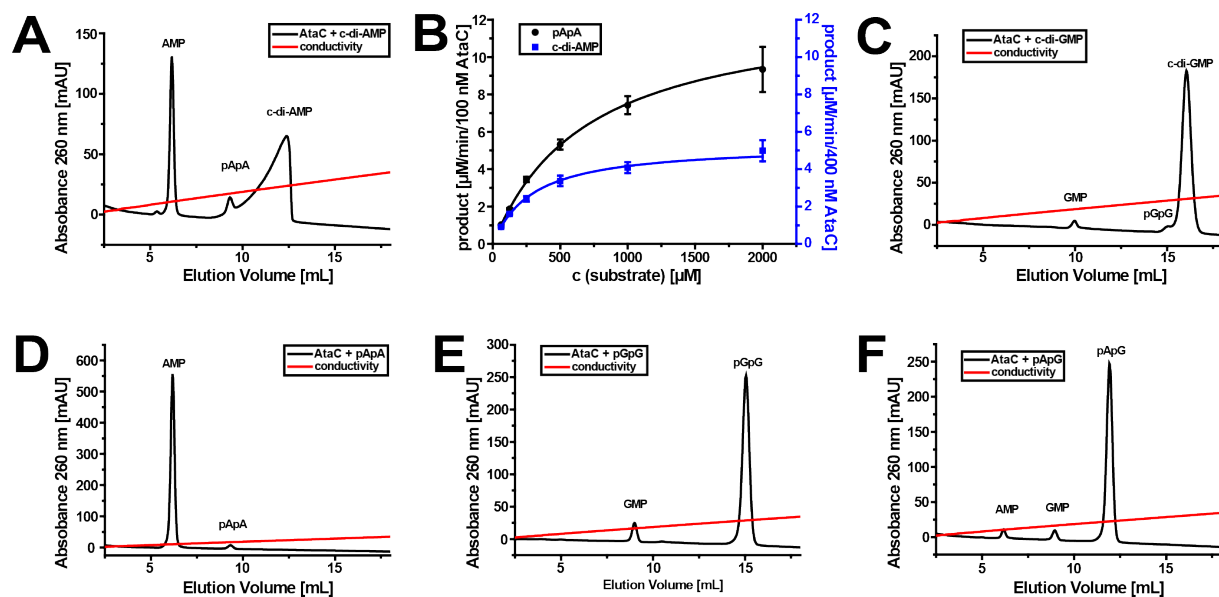

243

244 **Figure S2. Hydrolysis activity of AtaC is specific for adenosine bases.**

245 (A) Ion-exchange chromatography run on a Resource Q column of the reaction products after  
 246 1 h incubation from a 100  $\mu$ l reaction containing 100 nM AtaC + 250  $\mu$ M c-di-AMP.

247 (B) Michaelis-Menten kinetics of the reactions from 400 nM AtaC + c-di-AMP (62.5 – 2000  
 248  $\mu$ M) and 100 nM AtaC + 5'-pApA (62.5 – 2000  $\mu$ M) after 1 h of incubation at 37  $^{\circ}$ C. c-di-  
 249 AMP,  $K_M = 285 \pm 32 \mu\text{M}$ ,  $k_{\text{cat}} = 0.2 \text{ s}^{-1}$ ; 5'-pApA,  $K_M = 698 \pm 32 \mu\text{M}$ ,  $k_{\text{cat}} = 2.1 \text{ s}^{-1}$ . Shown are  
 250 mean values of  $n=3$  independent experiments and standard deviation.

251 (C) Ion-exchange chromatography run on a Resource Q column of the reaction products after  
 252 1 h incubation from a 100  $\mu$ l reaction containing 100 nM AtaC + 250  $\mu$ M c-di-GMP.

253 (D) Ion-exchange chromatography run on a Resource Q column of the reaction products after  
 254 1 h incubation from a 100  $\mu$ l reaction containing 100 nM AtaC + 250  $\mu$ M c-di-AMP.

255 (E) Ion-exchange chromatography run on a Resource Q column of the reaction products after  
 256 1 h incubation from a 100  $\mu$ l reaction containing 100 nM AtaC + 250  $\mu$ M 5'-pGpG.

257 (F) Ion-exchange chromatography run on a Resource Q column of the reaction products after 1  
 258 h incubation from a 100  $\mu$ l reaction containing 100 nM AtaC + 250  $\mu$ M 5'-pApG.

259

260

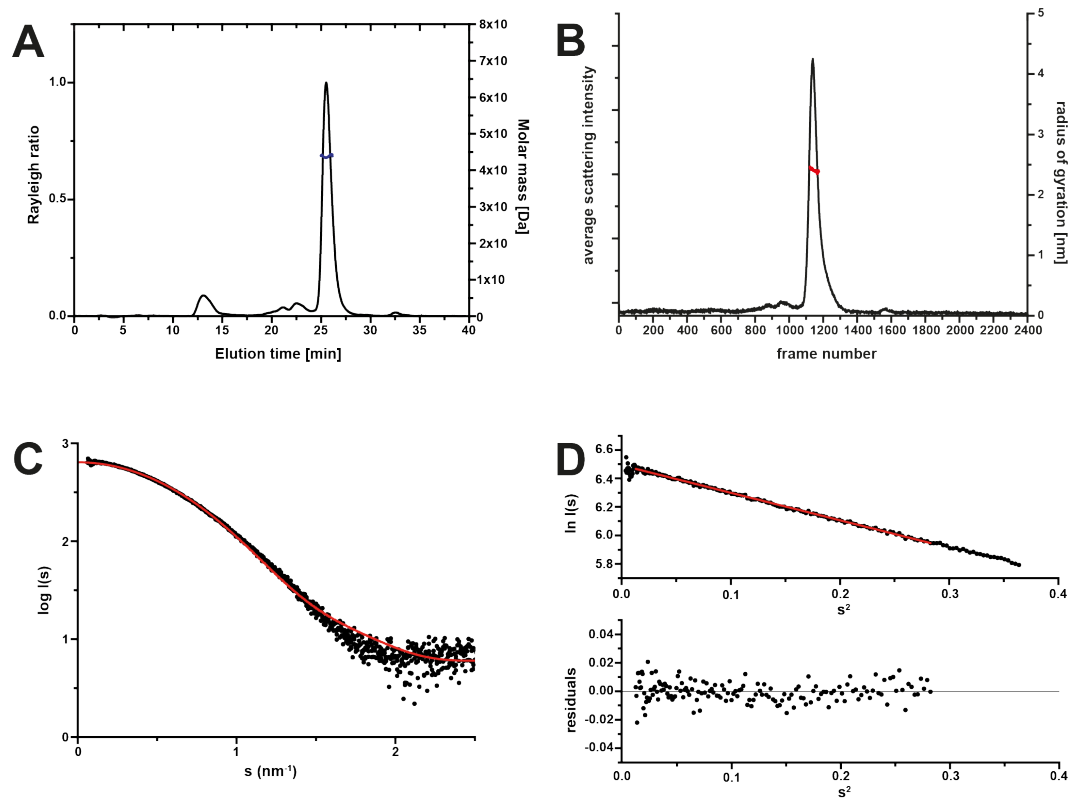

261

262 **Figure S3. AtaC is a monomer in solution.**

263 (A) Molecular weight determination of AtaC by SEC coupled multi-angle laser light scattering.

264 The obtained molecular weight is 43.7 kDa and stable for the main protein peak at 25 ml.

265 (B) shows the relative scattering intensity of the sample during a size-exclusion coupled SAXS  
 266 run at EMBL-P12 using a 24 ml Superdex increase S200 10/300 column (Intensity vs. frame  
 267 No.). The respective estimated radius of gyration for each frame in the main peak is shown in  
 268 red (right Y-axis).

269 (C) Measured SAXS curve of AtaC in 200 mM NaCl, 20 mM HEPES pH 7.5 and a theoretical  
 270 scattering curve (red) of the model of AtaC using PhnA as template (obtained from  
 271 HHpred/MODELLER (22),  $\chi^2=3.6$ ).

272 (D) Guinier plot  $\ln I(s)$  vs.  $s^2$  (top part) of the averaged buffer corrected scattering data (from  
 273 B) and the respective residuals of the linear regression ( $R_G= 2.41 \pm 0.1\text{nm}$ ). The equally  
 274 distributed errors of the linear regression (for  $s \cdot R_G < 1.3$ , Guinier approximation) indicates that  
 275 the sample is not aggregating.

276



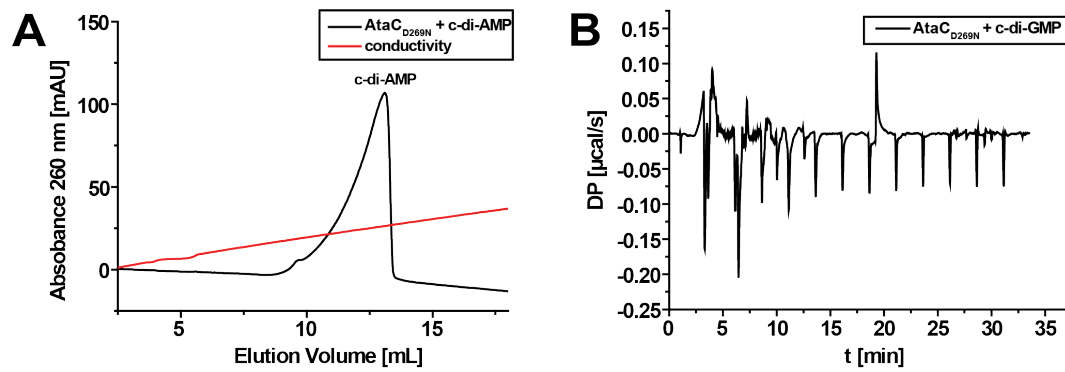

277

278 **Figure S4. AtaC<sub>D269N</sub> does not cleave c-di-AMP and does not bind c-di-GMP.**

279 (A) Ion-exchange chromatography run on a Resource Q column of the reaction products after  
 280 1 h incubation from a 100  $\mu$ l reaction containing 1  $\mu$ M AtaC<sub>D269N</sub> + 250  $\mu$ M c-di-AMP.

281 (B) ITC measurement of 20  $\mu$ M AtaC titrated with 140  $\mu$ M c-di-GMP. No binding was  
 282 detected.

283

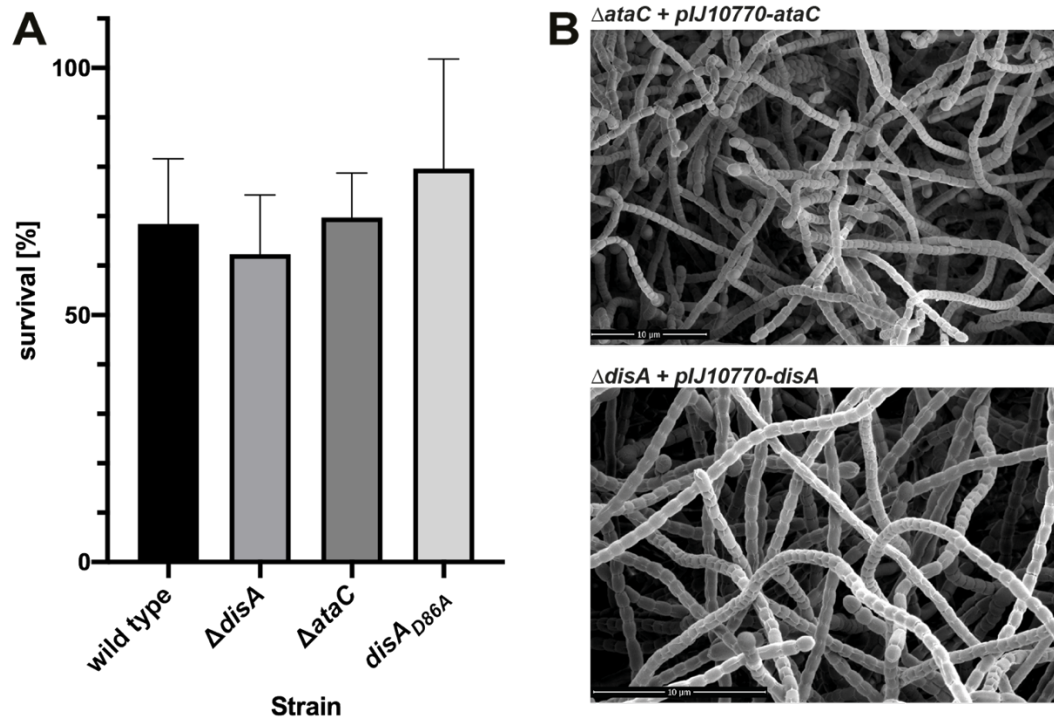

284

285 **Figure S5. Viability of spores produced by c-di-AMP mutants and complementation of**  
 286 **the  $\Delta ataC$  and  $\Delta disA$  strains with the wild type alleles.**

287 (A) Deletion or inactivation of c-di-AMP metabolizing enzymes has no impact on spore  
 288 viability of the respective mutants. Spores ( $\sim 10^9$  CFU/ml) were heat shocked for 1 h at 50 °C.  
 289 Spores were serially diluted and colony forming units (CFU) were determined. The survival of  
 290 each strain was assessed by the ratio CFU after the heat shock and CFU before the heat shock.  
 291 Data are presented as the mean of CFU counts from at least three different dilutions  $\pm$  standard  
 292 deviation and show representative data of three independent experiments.

293 (B) Upper panel: scanning electron micrographs show that expression of *ataC* from the *attB* <sub>$\Phi$ BT1</sub>  
 294 site under the control of the native promoter from pIJ10770 complemented the delayed  
 295 developmental phenotype of the *ataC* mutant. Lower panel: Expression of *disA* from pIJ10770  
 296 in the *disA* mutant did not alter the wild type phenotype of the mutant. For comparison see also  
 297 Figure 5B in the main text. Cells were grown on MYM for 4 days at 30 °C.

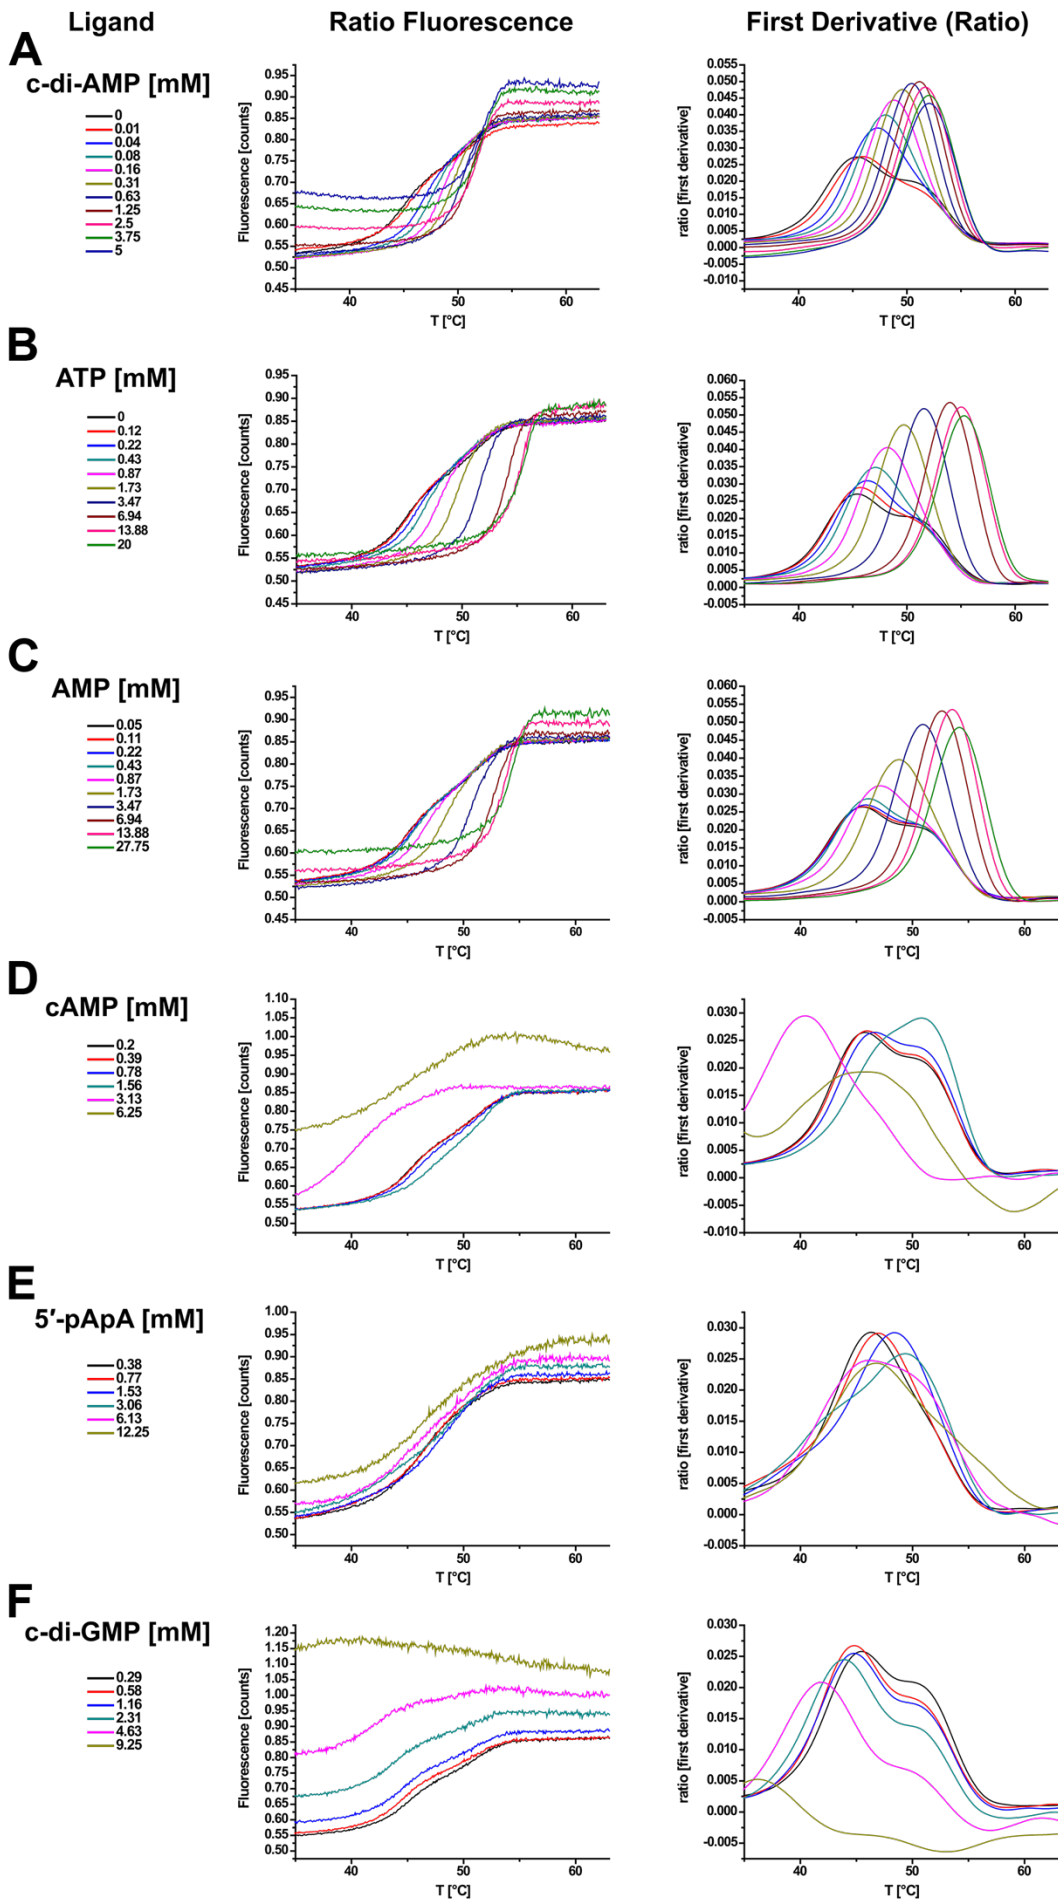

299 **Figure S6. CpeA preferentially binds c-di-AMP in nanoDSF.**

300 nanoDSF thermal shift assays at a heating rate of 1.5 °C/min: concentration legend (left  
301 panel), raw data ratio fluorescence (middle panel), raw data first derivative of ratio (right  
302 panel).

303 (A) nanoDSF thermal shift assay of 20  $\mu$ M CpeA with different concentrations of c-di-AMP  
304 (0 - 5 mM).

305 (B) nanoDSF thermal shift assay of 20  $\mu$ M CpeA with different concentrations of ATP (0 - 20  
306 mM).

307 (C) nanoDSF thermal shift assay of 20  $\mu$ M CpeA with different concentrations of AMP (0.05  
308 - 27.75 mM).

309 (D) nanoDSF thermal shift assay of 20  $\mu$ M CpeA with different concentrations of cAMP (0.2  
310 - 6.25 mM).

311 (E) nanoDSF thermal shift assay of 20  $\mu$ M CpeA with different concentrations of 5'-pApA  
312 (0.38 - 12.25 mM).

313 (F) nanoDSF thermal shift assay of 20  $\mu$ M CpeA with different concentrations of c-di-GMP  
314 (0.29 - 9.25 mM).

315

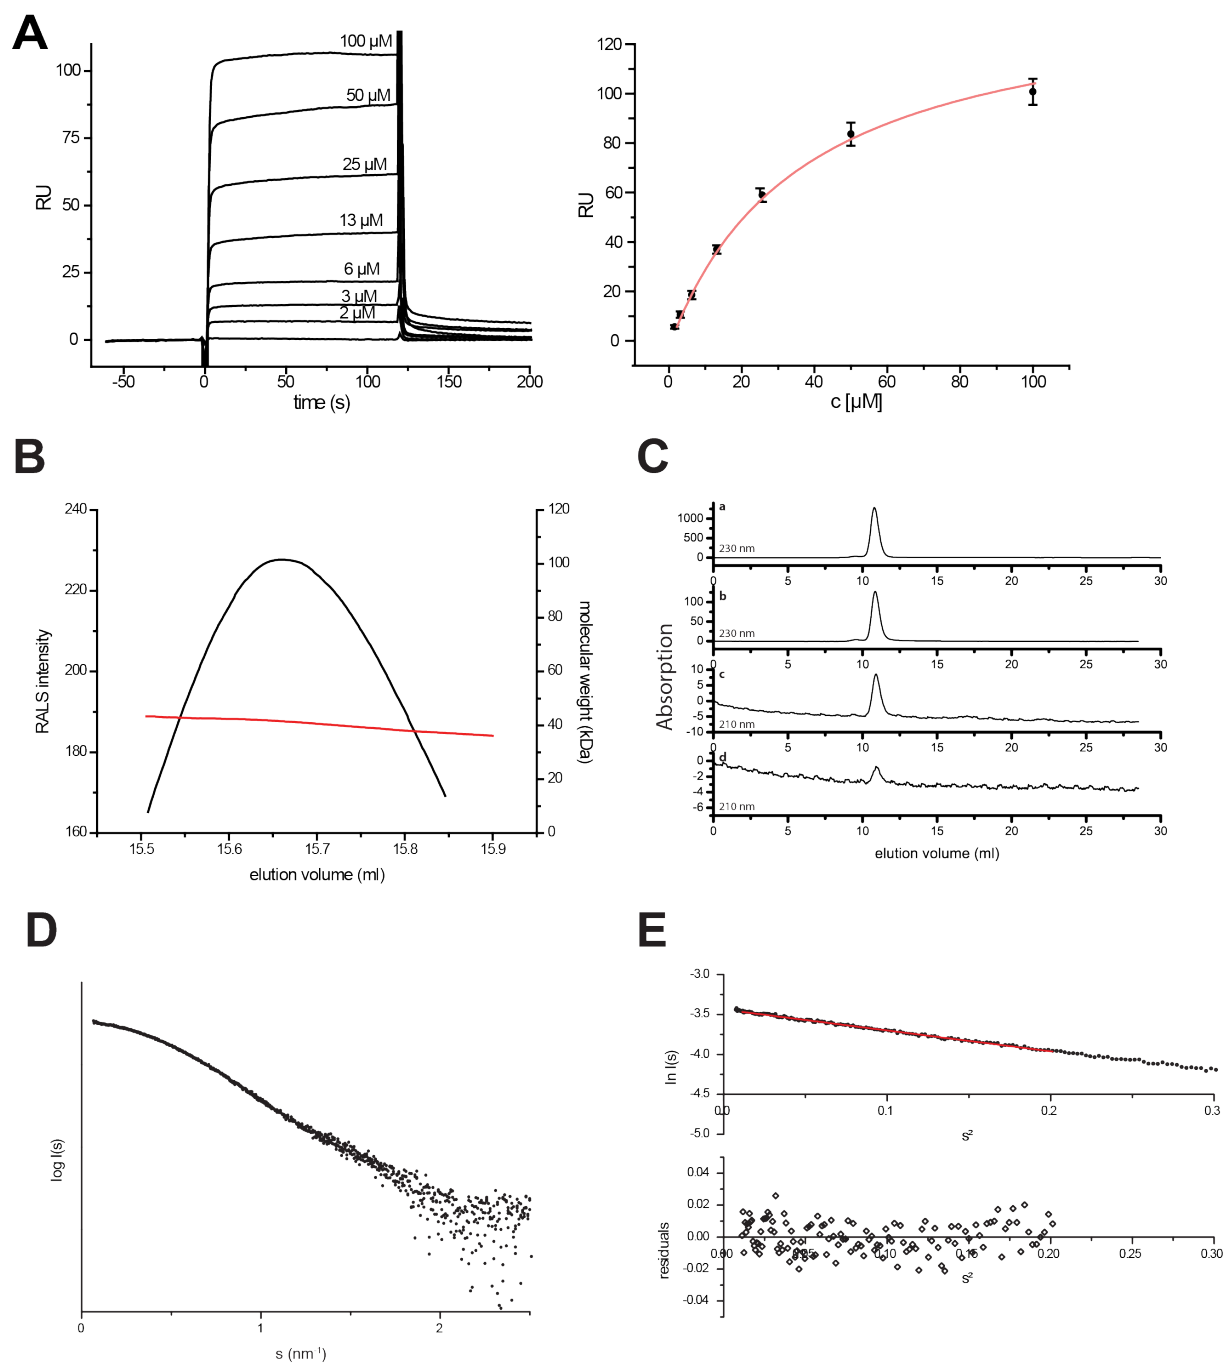

316

317 **Figure S7. CpeA binding of c-di-AMP and CpeA *in vitro* properties.**

318 (A) left panel: SPR sensorgram of biotin-c-di-AMP immobilized on a SA-chip with injections

319 of 1-100  $\mu\text{M}$  dimeric CpeA. Right panel: Binding curve fit of the steady state response units

320 for the titration of CpeA (dimer) and 2'-biotin-C<sub>16</sub>-c-di-AMP (one-site binding model,  $K_D =$

321  $37 \pm 2.9 \mu\text{M}$ ,  $R^2=0.997$ ) determined by SPR at 25 °C.

322 (B) shows the (only) peak of a size-exclusion coupled light scattering experiment using a CpeA-

323 sample (5 mg/ml CpeA) on loaded onto a Superdex S200 increase 10/300 column equilibrated

324 in buffer 20 mM Tris HCl pH 8, 200 mM NaCl, 3% glycerol, 1 mM DTT and the respective  
325 molecular weight curve (red) for the peak. The average molecular weight for the peak fraction  
326 is  $M_w^{SECRALS}=40.2$  kDa and stable for the whole peak region indicating that CpeA forms a  
327 dimer in solution.

328 (C) shows analytical size exclusion runs of different concentrations of CpeA (injected 100  $\mu$ l  
329 of a) 5 mg/ml, b) 0.5 mg/ml, c) 0.03 mg/ml, and d) 0.005 mg/ml) loaded on a Superdex S75  
330 10/300 column. The dimer peak at  $V_{elution}=10.8$  ml is stable for all concentrations indicating no  
331 detectable dissociation in this concentration regime.

332 (D) shows the small-angle X-ray scattering curve of a 1.6 mg/ml CpeA sample (in 200 mM  
333 NaCl, 30 mM NaP<sub>i</sub> pH 6.5, 5% v/v glycerol),

334 (E) the respective Guinier Plot  $\ln(I)$  vs  $s^2$  and residuals of the linear regression region (red dots).  
335 The molecular weight of CpeA determined from SAXS is  $M_w=39.1$  kDa with a radius of  
336 gyration of  $R_G=2.7$  nm (extrapolated from a concentration series to  $c=0$  mg/ml, the  $R_G$  for the  
337 curve shown in (C+D) is  $R_G^{c=1.6\text{mg/ml}}=2.78$  nm).

338

### 339 SUPPLEMENTARY REFERENCES

- 340 1. C. Stuttard, Temperate phages of *Streptomyces venezuelae*: lysogeny and host  
341 specificity shown by phages SV1 and SV2. *Microbiology* **128**, 115-121 (1982).
- 342 2. T. Kieser, M. J. Bibb, M. J. Buttner, K. F. Chater, D. A. Hopwood, *Practical*  
343 *Streptomyces Genetics*. (The John Innes Foundation, Norwich, 2000).
- 344 3. B. Gust, G. L. Challis, K. Fowler, T. Kieser, K. F. Chater, PCR-targeted *Streptomyces*  
345 gene replacement identifies a protein domain needed for biosynthesis of the  
346 sesquiterpene soil odor geosmin. *Proceedings of the National Academy of Sciences of*  
347 *the United States of America* **100**, 1541-1546 (2003).
- 348 4. B. Gust *et al.*, Lambda red-mediated genetic manipulation of antibiotic-producing  
349 *Streptomyces*. *Advances in applied microbiology* **54**, 107-128 (2004).
- 350 5. N. Tschowri *et al.*, Tetrameric c-di-GMP mediates effective transcription factor  
351 dimerization to control *Streptomyces* development. *Cell* **158**, 1136-1147 (2014).
- 352 6. R. J. St-Onge *et al.*, Nucleotide Second Messenger-Mediated Regulation of a Muralytic  
353 Enzyme in *Streptomyces*. *Molecular microbiology* **96**, 779-795 (2015).
- 354 7. M. A. Schumacher *et al.*, The *Streptomyces* master regulator BldD binds c-di-GMP  
355 sequentially to create a functional BldD<sub>2</sub>-(c-di-GMP)<sub>4</sub> complex. *Nucleic acids research*  
356 **45**, 6923-6933 (2017).
- 357 8. N. Costantino, D. L. Court, Enhanced levels of lambda Red-mediated recombinants in  
358 mismatch repair mutants. *Proceedings of the National Academy of Sciences of the*  
359 *United States of America* **100**, 15748-15753 (2003).
- 360 9. J. Germer, G. Becker, M. Metzner, R. Hengge-Aronis, Role of activator site position  
361 and a distal UP-element half-site for sigma factor selectivity at a CRP/H-NS-activated

- 362 sigma(s)-dependent promoter in *Escherichia coli*. *Molecular microbiology* **41**, 705-716  
363 (2001).
- 364 10. T. N. Huynh *et al.*, An HD-domain phosphodiesterase mediates cooperative hydrolysis  
365 of c-di-AMP to affect bacterial growth and virulence. *Proceedings of the National*  
366 *Academy of Sciences of the United States of America* **112**, E747-756 (2015).
- 367 11. M. Christen, B. Christen, M. Folcher, A. Schauerte, U. Jenal, Identification and  
368 characterization of a cyclic di-GMP-specific phosphodiesterase and its allosteric control  
369 by GTP. *The Journal of biological chemistry* **280**, 30829-30837 (2005).
- 370 12. J. Gundlach *et al.*, An essential poison: Synthesis and degradation of cyclic di-AMP in  
371 *Bacillus subtilis*. *Journal of bacteriology* 10.1128/JB.00564-15 (2015).
- 372 13. D. J. Drexler, M. Muller, C. A. Rojas-Cordova, A. M. Bandera, G. Witte, Structural and  
373 Biophysical Analysis of the Soluble DHH/DHHA1-Type Phosphodiesterase TM1595  
374 from *Thermotoga maritima*. *Structure* **25**, 1887-1897 e1884 (2017).
- 375 14. K. Hayashi *et al.*, Highly accurate genome sequences of *Escherichia coli* K-12 strains  
376 MG1655 and W3110. *Mol Syst Biol* **2**, 2006 0007 (2006).
- 377 15. S. Herbst *et al.*, Transmembrane redox control and proteolysis of PdeC, a novel type of  
378 c-di-GMP phosphodiesterase. *The EMBO journal* **37** (2018).
- 379 16. M. S. Paget, L. Chamberlin, A. Atrih, S. J. Foster, M. J. Buttner, Evidence that the  
380 extracytoplasmic function sigma factor sigmaE is required for normal cell wall structure  
381 in *Streptomyces coelicolor* A3(2). *Journal of bacteriology* **181**, 204-211 (1999).
- 382 17. K. A. Datsenko, B. L. Wanner, One-step inactivation of chromosomal genes in  
383 *Escherichia coli* K-12 using PCR products. *Proceedings of the National Academy of*  
384 *Sciences of the United States of America* **97**, 6640-6645 (2000).
- 385 18. L. C. Thomason, J. A. Sawitzke, X. Li, N. Costantino, D. L. Court, Recombineering:  
386 genetic engineering in bacteria using homologous recombination. *Curr Protoc Mol Biol*  
387 **106**, 1 16 11-39 (2014).
- 388 19. G. Witte, S. Hartung, K. Buttner, K. P. Hopfner, Structural biochemistry of a bacterial  
389 checkpoint protein reveals diadenylate cyclase activity regulated by DNA  
390 recombination intermediates. *Mol Cell* **30**, 167-178 (2008).
- 391 20. S. Schlimpert *et al.*, Two dynamin-like proteins stabilize FtsZ rings during *Streptomyces*  
392 sporulation. *Proceedings of the National Academy of Sciences of the United States of*  
393 *America* **114**, E6176-E6183 (2017).
- 394 21. M. M. Al-Bassam, J. Haist, S. A. Neumann, S. Lindenberg, N. Tschowri, Expression  
395 Patterns, Genomic Conservation and Input Into Developmental Regulation of the  
396 GGDEF/EAL/HD-GYP Domain Proteins in *Streptomyces*. *Front Microbiol* **9**, 2524  
397 (2018).
- 398 22. D. I. Svergun, C. Barberato, M. H. J. Koch, CRY SOL - a Program to Evaluate X-ray  
399 Solution Scattering of Biological Macromolecules from Atomic Coordinates *J. Appl.*  
400 *Cryst.* **28**, 768-773 (1995).
- 401
